# Supplementary material
Source: publisher figshare collection journal article supplement (https://acs.figshare.com/ndownloader/files/4113760)
Supplement: Supplementary file 1 [file 4113760]

 
data_TMF+MCF-3 
 
_audit_creation_method            SHELXL-97 
_chemical_name_systematic 
; 
 ? 
; 
_chemical_name_common             ? 
_chemical_melting_point           ? 
_chemical_formula_moiety          ? 
_chemical_formula_sum 
 'C21.50 H17.75 Cl1.50 O' 
_chemical_formula_weight          345.28 
 
loop_ 
 _atom_type_symbol 
 _atom_type_description 
 _atom_type_scat_dispersion_real 
 _atom_type_scat_dispersion_imag 
 _atom_type_scat_source 
 'C'  'C'   0.0033   0.0016 
 'International Tables Vol C Tables 4.2.6.8 and 6.1.1.4' 
 'H'  'H'   0.0000   0.0000 
 'International Tables Vol C Tables 4.2.6.8 and 6.1.1.4' 
 'O'  'O'   0.0106   0.0060 
 'International Tables Vol C Tables 4.2.6.8 and 6.1.1.4' 
 'Cl'  'Cl'   0.1484   0.1585 
 'International Tables Vol C Tables 4.2.6.8 and 6.1.1.4' 
 
_symmetry_cell_setting            'Monoclinic' 
_symmetry_space_group_name_H-M    'C2/c  ' 
 
loop_ 
 _symmetry_equiv_pos_as_xyz 
 'x, y, z' 
 '-x, y, -z+1/2' 
 'x+1/2, y+1/2, z' 
 '-x+1/2, y+1/2, -z+1/2' 
 '-x, -y, -z' 
 'x, -y, z-1/2' 
 '-x+1/2, -y+1/2, -z' 
 'x+1/2, -y+1/2, z-1/2' 
 
_cell_length_a                    19.853(3) 
_cell_length_b                    10.8323(15) 
_cell_length_c                    7.8131(11) 
_cell_angle_alpha                 90.00 
_cell_angle_beta                  90.00 
_cell_angle_gamma                 90.00 
_cell_volume                      1680.3(4) 
_cell_formula_units_Z             4 
_cell_measurement_temperature     100(2) 
_cell_measurement_reflns_used     4194 
_cell_measurement_theta_min       2.14 
_cell_measurement_theta_max       25.01
 
_exptl_crystal_description        'needle' 
_exptl_crystal_colour             'yellow' 
_exptl_crystal_size_max           0.39 
_exptl_crystal_size_mid           0.22 
_exptl_crystal_size_min           0.16 
_exptl_crystal_density_meas       ? 
_exptl_crystal_density_diffrn     1.365 
_exptl_crystal_density_method     'not measured' 
_exptl_crystal_F_000              721 
_exptl_absorpt_coefficient_mu     0.311 
_exptl_absorpt_correction_type    multi-scan 
_exptl_absorpt_correction_T_min   0.8882 
_exptl_absorpt_correction_T_max   0.9519 
_exptl_absorpt_process_details    SADABS 
 
_exptl_special_details 
; 
 ? 
; 
 
_diffrn_ambient_temperature       100(2) 
_diffrn_radiation_wavelength      0.71073 
_diffrn_radiation_type            MoK\a 
_diffrn_radiation_source          'fine-focus sealed tube' 
_diffrn_radiation_monochromator   graphite 
_diffrn_measurement_device_type   ? 
_diffrn_measurement_method        ? 
_diffrn_detector_area_resol_mean  ? 
_diffrn_standards_number          ? 
_diffrn_standards_interval_count  ? 
_diffrn_standards_interval_time   ? 
_diffrn_standards_decay_%         ? 
_diffrn_reflns_number             7930 
_diffrn_reflns_av_R_equivalents   0.0460 
_diffrn_reflns_av_sigmaI/netI     0.0301 
_diffrn_reflns_limit_h_min        -23 
_diffrn_reflns_limit_h_max        23 
_diffrn_reflns_limit_k_min        -12 
_diffrn_reflns_limit_k_max        12 
_diffrn_reflns_limit_l_min        -9 
_diffrn_reflns_limit_l_max        9 
_diffrn_reflns_theta_min          2.05 
_diffrn_reflns_theta_max          25.04 
_reflns_number_total              1500 
_reflns_number_gt                 1402 
_reflns_threshold_expression      >2sigma(I) 
 
_computing_data_collection        'Bruker SMART'
_computing_cell_refinement        'Bruker SMART' 
_computing_data_reduction         'Bruker SAINT' 
_computing_structure_solution     'SHELXS-97 (Sheldrick, 1990)' 
_computing_structure_refinement   'SHELXL-97 (Sheldrick, 1997)' 
_computing_molecular_graphics     'Bruker SHELXTL' 
_computing_publication_material   'Bruker SHELXTL' 
 
_refine_special_details 
; 
 Refinement of F^2^ against ALL reflections.  The weighted R-factor wR and 
 goodness of fit S are based on F^2^, conventional R-factors R are based 
 on F, with F set to zero for negative F^2^. The threshold expression of 
 F^2^ > 2sigma(F^2^) is used only for calculating R-factors(gt) etc. and is 
 not relevant to the choice of reflections for refinement.  R-factors based 
 on F^2^ are statistically about twice as large as those based on F, and R- 
 factors based on ALL data will be even larger. 
; 
 
_refine_ls_structure_factor_coef  Fsqd  
_refine_ls_matrix_type            full 
_refine_ls_weighting_scheme       calc  
_refine_ls_weighting_details 
 'calc w=1/[\s^2^(Fo^2^)+(0.0176P)^2^+4.4644P] where P=(Fo^2^+2Fc^2^)/3' 
_atom_sites_solution_primary      direct 
_atom_sites_solution_secondary    difmap 
_atom_sites_solution_hydrogens    geom 
_refine_ls_hydrogen_treatment     constr
_refine_ls_extinction_method      none 
_refine_ls_extinction_coef        ? 
_refine_ls_number_reflns          1500 
_refine_ls_number_parameters      114 
_refine_ls_number_restraints      0 
_refine_ls_R_factor_all           0.0624 
_refine_ls_R_factor_gt            0.0579 
_refine_ls_wR_factor_ref          0.1179 
_refine_ls_wR_factor_gt           0.1163 
_refine_ls_goodness_of_fit_ref    1.319 
_refine_ls_restrained_S_all       1.319 
_refine_ls_shift/su_max           0.000 
_refine_ls_shift/su_mean          0.000 
 
loop_ 
 _atom_site_label 
 _atom_site_type_symbol 
 _atom_site_fract_x 
 _atom_site_fract_y 
 _atom_site_fract_z 
 _atom_site_U_iso_or_equiv 
 _atom_site_adp_type 
 _atom_site_occupancy 
 _atom_site_symmetry_multiplicity 
 _atom_site_calc_flag 
 _atom_site_refinement_flags 
 _atom_site_disorder_assembly 
 _atom_site_disorder_group 
C13 C 0.24906(5) 0.19450(9) 0.22479(13) 0.0296(4) Uani 0.287(6) 1 d P A 1 
H13A H 0.2490 0.1417 0.1230 0.044 Uiso 0.287(6) 1 calc PR A 1 
H13B H 0.2088 0.2470 0.2240 0.044 Uiso 0.287(6) 1 calc PR A 1 
H13C H 0.2489 0.1429 0.3278 0.044 Uiso 0.287(6) 1 calc PR A 1 
Cl1 Cl 0.24906(5) 0.19450(9) 0.22479(13) 0.0296(4) Uani 0.713(6) 1 d P A 1 
C3 C 0.44341(13) 0.7009(3) 0.1858(3) 0.0199(6) Uani 1 1 d . . . 
H3 H 0.4048 0.6577 0.1460 0.024 Uiso 1 1 calc R . . 
C5 C 0.5000 0.5015(4) 0.2500 0.0201(9) Uani 1 2 d S . . 
C6 C 0.43679(13) 0.4288(2) 0.2381(3) 0.0177(6) Uani 1 1 d . A . 
C7 C 0.37760(13) 0.4673(3) 0.3206(3) 0.0195(6) Uani 1 1 d . . . 
H7 H 0.3773 0.5432 0.3817 0.023 Uiso 1 1 calc R . . 
C8 C 0.31963(13) 0.3965(3) 0.3144(4) 0.0222(6) Uani 1 1 d . A . 
H8 H 0.2800 0.4233 0.3714 0.027 Uiso 1 1 calc R . . 
C2 C 0.44297(13) 0.8250(3) 0.1798(3) 0.0214(6) Uani 1 1 d . . . 
C9 C 0.31986(14) 0.2857(3) 0.2240(4) 0.0228(7) Uani 1 1 d . . . 
O1 O 0.5000 1.0100(3) 0.2500 0.0317(7) Uani 1 2 d S . . 
C4 C 0.5000 0.6298(3) 0.2500 0.0171(8) Uani 1 2 d S . . 
C12 C 0.38713(14) 0.8972(3) 0.0990(4) 0.0262(7) Uani 1 1 d . . . 
H12A H 0.3530 0.8402 0.0545 0.039 Uiso 1 1 calc R . . 
H12B H 0.4052 0.9470 0.0048 0.039 Uiso 1 1 calc R . . 
H12C H 0.3666 0.9515 0.1846 0.039 Uiso 1 1 calc R . . 
C11 C 0.43545(13) 0.3170(3) 0.1494(3) 0.0199(6) Uani 1 1 d . . . 
H11 H 0.4751 0.2888 0.0937 0.024 Uiso 1 1 calc R A . 
C10 C 0.37746(14) 0.2466(3) 0.1411(4) 0.0229(6) Uani 1 1 d . A . 
H10 H 0.3772 0.1714 0.0785 0.027 Uiso 1 1 calc R . . 
C1 C 0.5000 0.8958(4) 0.2500 0.0208(9) Uani 1 2 d S . . 
 
loop_ 
 _atom_site_aniso_label 
 _atom_site_aniso_U_11 
 _atom_site_aniso_U_22 
 _atom_site_aniso_U_33 
 _atom_site_aniso_U_23 
 _atom_site_aniso_U_13 
 _atom_site_aniso_U_12 
C13 0.0194(5) 0.0287(6) 0.0406(6) -0.0055(4) 0.0016(4) -0.0104(4) 
Cl1 0.0194(5) 0.0287(6) 0.0406(6) -0.0055(4) 0.0016(4) -0.0104(4) 
C3 0.0168(13) 0.0220(14) 0.0207(14) -0.0014(12) 0.0024(11) -0.0021(12) 
C5 0.020(2) 0.026(2) 0.0141(19) 0.000 0.0011(15) 0.000 
C6 0.0187(14) 0.0168(14) 0.0176(14) 0.0030(11) -0.0018(11) 0.0016(11) 
C7 0.0193(14) 0.0180(14) 0.0212(14) 0.0002(11) -0.0026(11) 0.0004(11) 
C8 0.0153(14) 0.0265(15) 0.0247(15) 0.0037(12) 0.0005(11) 0.0023(11) 
C2 0.0209(14) 0.0223(15) 0.0208(14) 0.0010(12) 0.0049(11) 0.0017(12) 
C9 0.0185(14) 0.0222(15) 0.0276(15) 0.0037(12) -0.0005(11) -0.0063(12) 
O1 0.0344(17) 0.0177(16) 0.0430(19) 0.000 0.0025(14) 0.000 
C4 0.0203(19) 0.0161(19) 0.0148(19) 0.000 0.0043(15) 0.000 
C12 0.0265(16) 0.0223(15) 0.0296(16) 0.0032(13) 0.0017(12) 0.0037(12) 
C11 0.0182(14) 0.0198(14) 0.0219(14) 0.0024(12) 0.0026(11) 0.0017(11) 
C10 0.0258(15) 0.0182(14) 0.0246(15) -0.0001(12) -0.0003(12) -0.0034(12) 
C1 0.020(2) 0.018(2) 0.025(2) 0.000 0.0066(16) 0.000 
 
_geom_special_details 
; 
 All esds (except the esd in the dihedral angle between two l.s. planes) 
 are estimated using the full covariance matrix.  The cell esds are taken 
 into account individually in the estimation of esds in distances, angles 
 and torsion angles; correlations between esds in cell parameters are only 
 used when they are defined by crystal symmetry.  An approximate (isotropic) 
 treatment of cell esds is used for estimating esds involving l.s. planes. 
; 
 
loop_ 
 _geom_bond_atom_site_label_1 
 _geom_bond_atom_site_label_2 
 _geom_bond_distance 
 _geom_bond_site_symmetry_2 
 _geom_bond_publ_flag 
C13 C9 1.718(3) . ? 
C13 H13A 0.9800 . ? 
C13 H13B 0.9800 . ? 
C13 H13C 0.9800 . ? 
C3 C2 1.345(4) . ? 
C3 C4 1.452(3) . ? 
C3 H3 0.9500 . ? 
C5 C4 1.390(5) . ? 
C5 C6 1.485(3) . ? 
C5 C6 1.485(3) 2_655 ? 
C6 C11 1.396(4) . ? 
C6 C7 1.404(4) . ? 
C7 C8 1.384(4) . ? 
C7 H7 0.9500 . ? 
C8 C9 1.393(4) . ? 
C8 H8 0.9500 . ? 
C2 C1 1.473(3) . ? 
C2 C12 1.496(4) . ? 
C9 C10 1.381(4) . ? 
O1 C1 1.238(5) . ? 
C4 C3 1.452(3) 2_655 ? 
C12 H12A 0.9800 . ? 
C12 H12B 0.9800 . ? 
C12 H12C 0.9800 . ? 
C11 C10 1.382(4) . ? 
C11 H11 0.9500 . ? 
C10 H10 0.9500 . ? 
C1 C2 1.473(3) 2_655 ? 
 
loop_ 
 _geom_angle_atom_site_label_1 
 _geom_angle_atom_site_label_2 
 _geom_angle_atom_site_label_3 
 _geom_angle 
 _geom_angle_site_symmetry_1 
 _geom_angle_site_symmetry_3 
 _geom_angle_publ_flag 
C9 C13 H13A 109.5 . . ? 
C9 C13 H13B 109.5 . . ? 
C9 C13 H13C 109.5 . . ? 
C2 C3 C4 123.2(3) . . ? 
C2 C3 H3 118.4 . . ? 
C4 C3 H3 118.4 . . ? 
C4 C5 C6 122.05(17) . . ? 
C4 C5 C6 122.05(17) . 2_655 ? 
C6 C5 C6 115.9(3) . 2_655 ? 
C11 C6 C7 118.0(2) . . ? 
C11 C6 C5 120.5(2) . . ? 
C7 C6 C5 121.4(2) . . ? 
C8 C7 C6 121.0(3) . . ? 
C8 C7 H7 119.5 . . ? 
C6 C7 H7 119.5 . . ? 
C7 C8 C9 119.5(3) . . ? 
C7 C8 H8 120.2 . . ? 
C9 C8 H8 120.2 . . ? 
C3 C2 C1 120.1(3) . . ? 
C3 C2 C12 122.8(3) . . ? 
C1 C2 C12 117.1(2) . . ? 
C10 C9 C8 120.3(3) . . ? 
C10 C9 C13 120.2(2) . . ? 
C8 C9 C13 119.4(2) . . ? 
C5 C4 C3 122.05(17) . . ? 
C5 C4 C3 122.05(17) . 2_655 ? 
C3 C4 C3 115.9(3) . 2_655 ? 
C2 C12 H12A 109.5 . . ? 
C2 C12 H12B 109.5 . . ? 
H12A C12 H12B 109.5 . . ? 
C2 C12 H12C 109.5 . . ? 
H12A C12 H12C 109.5 . . ? 
H12B C12 H12C 109.5 . . ? 
C10 C11 C6 121.2(3) . . ? 
C10 C11 H11 119.4 . . ? 
C6 C11 H11 119.4 . . ? 
C9 C10 C11 119.9(3) . . ? 
C9 C10 H10 120.0 . . ? 
C11 C10 H10 120.0 . . ? 
O1 C1 C2 121.34(17) . 2_655 ? 
O1 C1 C2 121.34(17) . . ? 
C2 C1 C2 117.3(3) 2_655 . ? 
 
_diffrn_measured_fraction_theta_max    1.000 
_diffrn_reflns_theta_full              25.04 
_diffrn_measured_fraction_theta_full   1.000 
_refine_diff_density_max    0.304 
_refine_diff_density_min   -0.195 
_refine_diff_density_rms    0.055 
